# Supplementary material for: Authigenic apatite and octacalcium phosphate formation due to adsorption–precipitation switching across estuarine salinity gradients
Source: Copernicus journal article supplement (doi:10.5194/bg-12-723-2015), 2015-02-06
Supplement: Supplementary file 1 [file JFOxmann_LSchwendenmann_S1.pdf › JFOxmann_LSchwendenmann_S1.pdf]

1 Table S1. Physical-chemical sediment characteristics, P fractions, total P and nitrogen  
2 concentration at different depth intervals, Firth of Thames, New Zealand.

| Ecosystem                   | n   | Inun.<br>d/y <sup>1</sup> | Sal.<br>‰ | pH   | Ca-P<br>μmol/g | Al/Fe-P<br>μmol/g | Eh<br>mV | Ca-P <sub>meta</sub><br>μmol/g | Inorg. P<br>μmol/g | Org. P<br>μmol/g | TP<br>μmol/g | Nitrogen<br>mmol/g |
|-----------------------------|-----|---------------------------|-----------|------|----------------|-------------------|----------|--------------------------------|--------------------|------------------|--------------|--------------------|
| 0-5 cm                      |     |                           |           |      |                |                   |          |                                |                    |                  |              |                    |
| Bay                         | 4   | 365                       | 31        | 7.40 | 9.98           | 5.30              | -97      | 3.11                           | 15.28              | 21.75            | 37.03        | 0.08               |
| Tidal flat                  | 3   | 128                       | 21        | 7.37 | 6.73           | 8.22              | 19       | 2.21                           | 14.95              | 17.25            | 32.20        | 0.20               |
| Seedlings                   | 3   | 107                       | 23        | 7.24 | 6.83           | 10.00             | 1        | 2.42                           | 16.83              | 20.43            | 37.26        | 0.23               |
| Mangrove                    | 9   | 28                        | 29        | 6.69 | 6.20           | 12.09             | 244      | 2.38                           | 18.28              | 21.81            | 40.09        | 0.29               |
| Salt Marsh                  | 6   | 2                         | 26        | 6.05 | 3.83           | 12.68             | 505      | 1.76                           | 16.51              | 23.39            | 39.90        | 0.38               |
| Pasture                     | 3   | 0                         | 0         | 5.20 | 3.37           | 17.90             | 563      | 2.31                           | 21.27              | 34.35            | 55.65        | 0.80               |
| Average                     | 28  |                           | 22        | 6.66 | 6.16           | 11.03             | 206      | 2.37                           | 17.19              | 23.16            | 40.35        | 0.33               |
| Rivers                      | 6   | 365                       | 11        | 7.36 | 7.13           | 12.81             | -10      | ND                             | 19.95              | ND               | ND           | 0.12               |
| 10-15 cm                    |     |                           |           |      |                |                   |          |                                |                    |                  |              |                    |
| Bay                         | 4   | 365                       | 33        | 7.39 | 11.37          | 5.15              | -141     | 2.76                           | 16.52              | ND               | ND           | 0.10               |
| Tidal flat                  | 3   | 128                       | 22        | 7.18 | 7.26           | 6.03              | -66      | 2.09                           | 13.29              | ND               | ND           | 0.19               |
| Seedlings                   | 3   | 107                       | 23        | 7.24 | 7.58           | 6.75              | -61      | 1.87                           | 14.33              | ND               | ND           | 0.20               |
| Mangrove                    | 9   | 28                        | 32        | 6.68 | 7.17           | 10.57             | 208      | 2.37                           | 17.75              | ND               | ND           | 0.21               |
| Salt Marsh                  | 6   | 2                         | 25        | 6.14 | 7.44           | 15.41             | 450      | 1.88                           | 22.85              | ND               | ND           | 0.21               |
| Pasture                     | 3   | 0                         | 0         | 5.18 | 4.66           | 11.50             | 607      | 1.28                           | 16.16              | ND               | ND           | 0.25               |
| Average                     | 28  |                           | 23        | 6.64 | 7.58           | 9.24              | 166      | 2.04                           | 16.82              | ND               | ND           | 0.19               |
| Rivers                      | 6   | 365                       | 12        | 7.10 | 6.79           | 8.05              | -32      | ND                             | 14.84              | ND               | ND           | 0.12               |
| 30-35 cm                    |     |                           |           |      |                |                   |          |                                |                    |                  |              |                    |
| Bay                         | 4   | 365                       | 31        | 7.29 | 11.11          | 3.94              | -140     | 2.83                           | 15.05              | 19.87            | 34.92        | 0.09               |
| Tidal flat                  | 3   | 128                       | 20        | 7.32 | 6.59           | 5.78              | -90      | 2.16                           | 12.37              | 18.55            | 30.92        | 0.15               |
| Seedlings                   | 3   | 107                       | 23        | 7.34 | 7.28           | 6.05              | -130     | 2.07                           | 13.33              | 17.82            | 31.15        | 0.17               |
| Mangrove                    | 9   | 28                        | 39        | 6.70 | 7.12           | 13.50             | 142      | 2.56                           | 20.62              | 18.31            | 38.93        | 0.19               |
| Salt Marsh                  | 6   | 2                         | 25        | 6.47 | 7.36           | 13.21             | 401      | 2.24                           | 20.57              | 18.40            | 38.97        | 0.15               |
| Pasture                     | 3   | 0                         | 0         | 5.30 | 4.06           | 11.90             | 596      | 1.12                           | 15.96              | 18.24            | 34.20        | 0.13               |
| Average                     | 28  |                           | 23        | 6.74 | 7.25           | 9.06              | 130      | 2.16                           | 16.32              | 18.53            | 34.85        | 0.15               |
| Rivers                      | 6   | 365                       | 15        | 7.23 | 7.63           | 5.20              | -62      | ND                             | 12.82              | 14.19            | 27.01        | 0.09               |
| 35-40 cm                    |     |                           |           |      |                |                   |          |                                |                    |                  |              |                    |
| Bay                         | 4   | 365                       | 31        | 7.27 | 10.84          | 4.60              | -119     | 2.53                           | 15.45              | ND               | ND           | 0.09               |
| Tidal flat                  | 3   | 128                       | 21        | 7.31 | 6.85           | 5.46              | -127     | 2.21                           | 12.31              | ND               | ND           | 0.13               |
| Seedlings                   | 3   | 107                       | 23        | 7.34 | 7.17           | 6.15              | -135     | 2.21                           | 13.32              | ND               | ND           | 0.15               |
| Mangrove                    | 9   | 28                        | 39        | 6.64 | 6.77           | 9.87              | 22       | 2.35                           | 16.64              | ND               | ND           | 0.18               |
| Salt Marsh                  | 6   | 2                         | 25        | 6.53 | 7.03           | 14.57             | 378      | 2.82                           | 21.60              | ND               | ND           | 0.13               |
| Pasture                     | 3   | 0                         | 0         | 5.27 | 4.32           | 10.77             | 621      | 1.10                           | 15.10              | ND               | ND           | 0.12               |
| Average                     | 28  |                           | 23        | 6.73 | 7.16           | 8.75              | 107      | 2.20                           | 15.74              | ND               | ND           | 0.13               |
| Rivers                      | 6   | 365                       | 16        | 7.22 | 7.06           | 5.48              | -81      | ND                             | 12.54              | ND               | ND           | 0.09               |
| All layers                  |     |                           |           |      |                |                   |          |                                |                    |                  |              |                    |
| Bay                         | 16  | 365                       | 32        | 7.34 | 10.83          | 4.75              | -124     | 2.81                           | 15.58              | ND               | ND           | 0.09               |
| Tidal flat                  | 12  | 128                       | 21        | 7.30 | 6.86           | 6.37              | -66      | 2.17                           | 13.23              | ND               | ND           | 0.17               |
| Seedlings                   | 12  | 107                       | 23        | 7.29 | 7.22           | 7.24              | -81      | 2.14                           | 14.45              | ND               | ND           | 0.19               |
| Mangrove                    | 36  | 28                        | 35        | 6.68 | 6.82           | 11.51             | 154      | 2.42                           | 18.32              | ND               | ND           | 0.22               |
| Salt Marsh                  | 24  | 2                         | 25        | 6.30 | 6.42           | 13.97             | 434      | 2.18                           | 20.38              | ND               | ND           | 0.22               |
| Pasture                     | 12  | 0                         | 0         | 5.24 | 4.10           | 13.02             | 597      | 1.45                           | 17.12              | ND               | ND           | 0.33               |
| Average                     | 112 |                           | 23        | 6.69 | 7.04           | 9.48              | 152      | 2.19                           | 16.51              | ND               | ND           | 0.20               |
| Rivers                      | 24  | 365                       | 14        | 7.23 | 7.15           | 7.89              | -46      | ND                             | 15.04              | ND               | ND           | 0.11               |
| Change from pasture to bay  |     |                           |           |      |                |                   |          |                                |                    |                  |              |                    |
| Average <sup>2</sup>        | 28  |                           |           |      | <b>+6.73</b>   | <b>-8.27</b>      |          |                                | -1.54              | ND               | ND           |                    |
| Change from 0-5 to 30-35 cm |     |                           |           |      |                |                   |          |                                |                    |                  |              |                    |
| Native <sup>3</sup>         | 25  |                           |           |      | <b>+1.18</b>   | <b>-1.16</b>      |          |                                | +0.02              | -2.34            | -2.32        |                    |
| Pasture                     | 3   |                           |           |      | <b>+0.69</b>   | <b>-6.00</b>      |          |                                | -5.31              | -16.11           | -21.45       |                    |

3 <sup>1</sup>Inundation frequency (days/year)

4 <sup>2</sup>Increase or decrease from pasture to bay (average among all layers)

5 <sup>3</sup>Increase or decrease with depth (average among bay, tidal flat, seedlings, mangrove and salt marsh)

6 ND: not determined
