# Supplementary material for: Authigenic apatite and octacalcium phosphate formation due to adsorption–precipitation switching across estuarine salinity gradients
Source: Copernicus journal article supplement (doi:10.5194/bg-12-723-2015), 2015-02-06
Supplement: Supplementary file 3 [file JFOxmann_LSchwendenmann_S3.pdf › JFOxmann_LSchwendenmann_S3.pdf]

1 Table S3. Ranges of total phosphorus concentrations in coastal sediments.

| System                  | Study area                          | Layer        | TP range <sup>1</sup> |           | AVG <sup>2</sup> | Reference                                      |
|-------------------------|-------------------------------------|--------------|-----------------------|-----------|------------------|------------------------------------------------|
|                         |                                     | cm           | Min.                  | Max.      |                  |                                                |
| <b>Bay</b>              | <b>Firth of Thames, New Zealand</b> | <b>0-5</b>   | <b>28</b>             | <b>41</b> | <b>37</b>        | <b>This study</b>                              |
| <b>Bay</b>              | <b>Firth of Thames, New Zealand</b> | <b>30-35</b> | <b>23</b>             | <b>50</b> | <b>34</b>        | <b>This study</b>                              |
| Bay                     | Akaroa Harbour, New Zealand         | 0-10         | 19                    | 24        | 21               | Fenwick, 2004 <sup>3</sup>                     |
| Bay                     | Porirua Harbour, New Zealand        | 0-2          | 5                     | 14        | 9                | Sorensen and Milne, 2009                       |
| <b>Tidal flat</b>       | <b>Firth of Thames, New Zealand</b> | <b>0-5</b>   | <b>31</b>             | <b>33</b> | <b>32</b>        | <b>This study</b>                              |
| <b>Tidal flat</b>       | <b>Firth of Thames, New Zealand</b> | <b>30-35</b> | <b>25</b>             | <b>34</b> | <b>31</b>        | <b>This study</b>                              |
| Tidal flat              | Okains Bay, New Zealand             | 0-2          | 22                    | 28        | 26               | Lesley Bolton-Ritchie, 2008 <sup>3</sup>       |
| Tidal flat              | Lyttelton Harbour, New Zealand      | 0-2          | 18                    | 32        | 23               | Lesley Bolton-Ritchie, 2013                    |
| Tidal flat              | Robinsons Bay, New Zealand          | 0-2          | 17                    | 27        | 22               | Lesley Bolton-Ritchie, 2005                    |
| Tidal flat              | Takamatua, New Zealand              | 0-2          | 17                    | 18        | 18               | Lesley Bolton-Ritchie, 2005                    |
| Tidal flat              | Barrys Bay, New Zealand             | 0-2          | 16                    | 21        | 18               | Lesley Bolton-Ritchie, 2005                    |
| Tidal flat              | Duvauchelle, New Zealand            | 0-2          | 13                    | 17        | 15               | Lesley Bolton-Ritchie, 2005                    |
| Tidal flat              | Saigon River Delta, Vietnam         | 0-5          | 13                    | 16        | 14               | Oxmann et al., 2008, 2010 <sup>4</sup>         |
| Tidal flat              | Saigon River Delta, Vietnam         | 30-35        | 14                    | 15        | 15               | Oxmann et al., 2008, 2010 <sup>4</sup>         |
| Tidal flat              | Haldane Estuary, New Zealand        | 0-2          | 11                    | 13        | 12               | Robertson and Stevens, 2010                    |
| Tidal flat              | Porirua Harbour, New Zealand        | 0-2          | 9                     | 18        | 12               | Sorensen and Milne, 2009                       |
| Tidal flat              | Ratones mangrove, Brazil            | 0-5          | 7                     | 12        |                  | Mater et al., 2004                             |
| Tidal flat              | Mondego estuary, Portugal           | 0-37.5       | 15                    | 20        |                  | Lillebo, 2007                                  |
| <b>Tidal river</b>      | <b>Firth of Thames, New Zealand</b> | <b>30-35</b> | <b>23</b>             | <b>34</b> | <b>27</b>        | <b>This study</b>                              |
| Tidal river             | Ratones mangrove, Brazil            | 0-5          | 3                     | 15        |                  | Mater et al., 2004                             |
| Tidal river             | Itacorubi mangrove, Brazil          | 0-5          | 3                     | 4         |                  | Mater et al., 2004                             |
| <b>Mangrove</b>         | <b>Firth of Thames, New Zealand</b> | <b>0-5</b>   | <b>35</b>             | <b>48</b> | <b>40</b>        | <b>This study</b>                              |
| <b>Mangrove</b>         | <b>Firth of Thames, New Zealand</b> | <b>30-35</b> | <b>27</b>             | <b>55</b> | <b>39</b>        | <b>This study</b>                              |
| Mangrove                | Saigon River Delta, Vietnam         | 0-5          | 10                    | 19        | 15               | Oxmann et al., 2008, 2010 <sup>4</sup>         |
| Mangrove                | Saigon River Delta, Vietnam         | 30-35        | 8                     | 14        | 11               | Oxmann et al., 2008, 2010 <sup>4</sup>         |
| Mangrove                | Whitford embayment, New Zealand     | 0-1.5        | 6                     | 20        | 11               | Ellis et al., 2004                             |
| Mangrove                | Warri, Nigeria                      | 0-150        | 11                    | 23        |                  | Hesse, 1963                                    |
| Mangrove                | Hinchinbrook Island, Australia      | 0-5          | 11                    | 17        |                  | Boto and Wellington, 1984                      |
| Mangrove                | Hinchinbrook Island, Australia      | 95-100       | 7                     | 12        |                  | Boto and Wellington, 1984                      |
| Mangrove                | Sunderbans, India                   | 0-25         | 3                     | 15        |                  | Sahoo et al., 1985 <sup>5</sup>                |
| Mangrove                | Queensland estuaries, Australia     | 0-2          | 4                     | 22        |                  | Alongi, 1987; Alongi et al., 1992 <sup>5</sup> |
| Mangrove                | Iriomote Island, Japan              | 0-5          | 7                     | 12        |                  | Kuraishi et al., 1985 <sup>5</sup>             |
| Mangrove                | Sinnamary River, French Guiana      | ND           | 19                    | 26        |                  | Fabre, 1999                                    |
| <b>Salt marsh</b>       | <b>Firth of Thames, New Zealand</b> | <b>0-5</b>   | <b>35</b>             | <b>43</b> | <b>39</b>        | <b>This study</b>                              |
| <b>Salt marsh</b>       | <b>Firth of Thames, New Zealand</b> | <b>0-5</b>   | <b>37</b>             | <b>44</b> | <b>40</b>        | <b>This study</b>                              |
| Salt marsh              | Cooper River estuary, USA           | 0-20         | ng                    | 18        |                  | Sundareshwar and Morris, 1999                  |
| Salt marsh              | Cooper River estuary, USA           | 10-20        | ng                    | 23        |                  | Sundareshwar and Morris, 1999                  |
| Salt marsh              | Cooper River estuary, USA           | 0-100        | 5                     | 15        |                  | Paludan and Morris, 1999                       |
| Salt marsh <sup>6</sup> | Cooper River estuary, USA           | 0-100        | 10                    | 20        |                  | Paludan and Morris, 1999                       |
| Salt marsh              | Mondego estuary, Portugal           | 0-37.5       | 15                    | 20        |                  | Lillebo, 2007                                  |

2 <sup>1</sup>Approximate total P range in  $\mu\text{mol g}^{-1}$

3 <sup>2</sup>Average concentrations given only for New Zealand sites and the Saigon River Delta site (partly not available  
4 for other sites)

5 <sup>3</sup> $\mu\text{mol ml}^{-1}$

6 <sup>4</sup>Oxmann, unpublished data

7 <sup>5</sup>Taken from Alongi et al. (1992)

8 <sup>6</sup>Salt marsh inlet

## References

- Alongi, D. M., Boto, K. G., and Robertson, A. I.: Nitrogen and phosphorus cycles, in: Tropical mangrove ecosystems, edited by: Robertson, A. I. and Boto, K. G., Coastal and Estuarine Studies 41, American Geophysical Union, Washington, DC, 251-292, 1992.
- Bolton-Ritchie, L.: Sediments and macrobiota of the intertidal flats of inner Akaroa Harbour, Technical Report No. U05/64, Environment Canterbury, Christchurch, New Zealand, 36 pp., 2005.
- Bolton-Ritchie, L.: Ecological status of Okains Bay estuary, Technical Report No. R08/53, Environment Canterbury, Christchurch, New Zealand, 46 pp., 2008.
- Bolton-Ritchie, L.: Sediments and invertebrate biota of the intertidal mudflats of upper Lyttelton Harbour/Whakaraupo, Technical Report, Banks Peninsula Water Management Zone Committee Agenda, Christchurch City Council, Christchurch, New Zealand, 36-90., 2013.
- Boto, K. G. and Wellington, J. T.: Soil characteristics and nutrient status in a Northern Australian mangrove forest, *Estuaries*, 7, 61-69, 1984.
- Ellis, J., Nicholls, P., Craggs, R., Hofstra, D., and Hewitt, J.: Effects of terrigenous sedimentation on mangrove physiology and associated macrobenthic communities, *Mar. Ecol. Prog. Ser.*, 270, 71-82, 2004.
- Fabre, A., Fromard, Fr., and Trichon, V.: Fractionation of phosphate in sediments of four representative mangrove stages (French Guiana), *Hydrobiologia*, 392, 13-19, 1999.
- Fenwick, G. D.: Marine ecology of Akaroa Harbour: rocky shores and subtidal soft bottoms, Technical Report CHC2004-056, NIWA, Christchurch, New Zealand, 36 pp., 2004.
- Hesse, P. R.: Phosphorus relationships in a mangrove-swamp mud with particular reference to aluminium toxicity, *Plant Soil*, 19, 205-218, 1963.
- Kuraishi, S., Kojima, K., Miyauchi, H., Sakurai, N., Tsubota, H., Ninaki, M., Goto, I., and Sugi, J.: Brackish water and soil components of mangrove forests on Iriomote Island, Japan. *Biotropica*, 17, 277-286, 1985.
- Lillebø, A. I., Coelho, J. P., Flindt, M. R., Jensen H. S., Marques, J. C., Pedersen, C. B., and Pardal, M. A.: *Spartina maritima* influence on the dynamics of the phosphorus sedimentary cycle in a warm temperate estuary (Mondego estuary, Portugal), *Hydrobiologia*, 587, 195-204, 2007.

- 1 Mater, L., Alexandre, M. R., Hansel, F. A., and Madureira, L. A. S: Assessment of lipid  
2 compounds and phosphorus in mangrove sediments of Santa Catarina Island, SC, Brazil, J.  
3 Braz. Chem. Soc., 15, 725-734, 2004.
- 4 Paludan, C. and Morris, J. T.: Distribution and speciation of phosphorus along a salinity  
5 gradient in intertidal marsh sediments, Biogeochemistry, 45, 197-221, 1999.
- 6 Robertson, B. and Stevens, L.: Porirua Harbour: Intertidal fine scale monitoring 2008/09,  
7 Report prepared for Greater Wellington Regional Council, Wellington, New Zealand, 22 pp.,  
8 2009.
- 9 Sahoo, A. K., Sah, K. D., Gupta, S. K.: Studies on nutrient status of some mangrove muds of  
10 the Sunderbans, in: The mangroves, edited by: Bhosale, L., Shivaji University Kolhapur,  
11 India, 375-377, 1985.
- 12 Sorensen, P. G. and Milne, J. R.: Porirua Harbour targeted intertidal sediment quality  
13 assessment, Report prepared for Greater Wellington Regional Council, Wellington, New  
14 Zealand, 71 pp., 2009.
- 15 Sundareshwar, P. V. and Morris, J. T.: Phosphorus sorption characteristics of intertidal marsh  
16 sediments along an estuarine salinity gradient, Limnol. Oceanogr., 44, 1693-1701, 1999.
