# Supplementary material for: Authigenic apatite and octacalcium phosphate formation due to adsorption–precipitation switching across estuarine salinity gradients
Source: Copernicus journal article supplement (doi:10.5194/bg-12-723-2015), 2015-02-06
Supplement: Supplementary file 4 [file bg-12-723-2015-supplement-cover-letter.pdf › bg-12-723-2015-supplement-cover-letter.pdf]

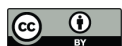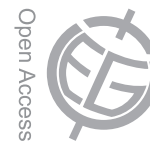

## *Supplement of*

# **Authigenic apatite and octacalcium phosphate formation due to adsorption–precipitation switching across estuarine salinity gradients**

**J. F. Oxmann and L. Schwendenmann**

*Correspondence to:* J. F. Oxmann (joxmann@geomar.de)

- [bg-12-723-2015-supplement-cover-letter.pdf](#)
- [JFOxmann\\_LSchwendenmann\\_S1.pdf](#)
- [JFOxmann\\_LSchwendenmann\\_S2.pdf](#)
- [JFOxmann\\_LSchwendenmann\\_S3.pdf](#)
- [supplement-cover-letter.pdf](#)
