# Supplementary material for: Authigenic apatite and octacalcium phosphate formation due to adsorption–precipitation switching across estuarine salinity gradients
Source: Copernicus journal article supplement (doi:10.5194/bg-12-723-2015), 2015-02-06
Supplement: Supplementary file 5 [file supplement-cover-letter.pdf › supplement-cover-letter.pdf]

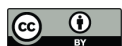

## *Supplement of*

# **Calcium phosphate formation due to pH-induced adsorption/precipitation switching along salinity gradients**

**J. F. Oxmann and L. Schwendenmann**

*Correspondence to:* J. F. Oxmann ([joxmann@geomar.de](mailto:joxmann@geomar.de))

- Supplement-Cover-Letter.pdf
- JFOxmann\_LSchwendenmann\_S1.pdf
- JFOxmann\_LSchwendenmann\_S2.pdf
- JFOxmann\_LSchwendenmann\_S3.pdf
